# Supplementary material
Source: PubMed Central journal article supplement (PMC8689815)
Supplement: NIHMS1730230-supplement-Appendices.pdf [file NIHMS1730230-supplement-Appendices.pdf]

**Appendix 1. Mother-Fetus or Infant Dyads Included in this Systematic Review for Ultrasound and Congenital Zika Virus Exposure**

| Reference                      | Country of Zika exposure                        | USPSTF internal validity rating,* NOS† | Number of dyads included for ultrasound |
|--------------------------------|-------------------------------------------------|----------------------------------------|-----------------------------------------|
| Brasil, 2016 (1)               | Brazil                                          | II-2;                                  | 55                                      |
| Hoen, 2018 (2)                 | France (Martinique and Guadeloupe)              | II-2; 5                                | 37                                      |
| Pomar, 2017 (3)                | France (French Guiana)                          | II-2; 6                                | 5                                       |
| Rodo, 2019 (4)                 | Central or South America, or Dominican Republic | II-2; 4                                | 8                                       |
| Sanz Cortes, 2018 (5)          | Colombia                                        | II-2; 4                                | 12                                      |
| Sarno, 2016 (6)                | Brazil                                          | II-2; 4                                | 31                                      |
| Walker, 2018 (7)               | “countries with local transmission”             | II-2; 7                                | 42                                      |
| Acosta-Reyes, 2017 (8)         | Colombia                                        | III                                    | 1                                       |
| Aragao, 2016 (9)               | Brazil                                          | III                                    | 5                                       |
| Arauz, 2016 (10)               | Panama                                          | III                                    | 1                                       |
| Azevedo, 2018 (11)             | Brazil                                          | III                                    | 2                                       |
| Beaufrère, 2019 (78)           | Martinique, Guadeloupe, Venezuela               | III                                    | 3                                       |
| Benjamin, 2017 (13)            | Venezuela                                       | III                                    | 1                                       |
| Besnard, 2016 (14)             | France (French Polynesia)                       | III                                    | 8                                       |
| Brito, 2018 (15)               | Brazil                                          | III                                    | 1                                       |
| Calvet, 2016 (16)              | Brazil                                          | III                                    | 2                                       |
| <i>Melo, 2016 (17)</i>         | <i>Brazil</i>                                   | <i>III</i>                             | <i>(2) ‡</i>                            |
| Carvalho, 2016 (18)            | Brazil                                          | III                                    | 19                                      |
| Castro, 2017 (19)              | Brazil                                          | III                                    | 8                                       |
| Chen, 2017 (20)                | Unites States (Florida)                         | III                                    | 1                                       |
| Contreras-Capetillo, 2017 (21) | Mexico                                          | III                                    | 2                                       |
| Culjat, 2016 (22)              | Brazil                                          | III                                    | 1                                       |
| Davila-Castrodad 2018 (23)     | US (Puerto Rico)                                | III                                    | 1                                       |
| De Oliveira Dias, 2017 (24)    | Brazil                                          | III                                    | 1                                       |
| De Oliveira Melo, 2016 (25)    | Brazil                                          | III                                    | 1                                       |
| Diaz-Menendez, 2016 (26)       | Colombia, Venezuela, or Honduras                | III                                    | 1                                       |
| Driggers, 2016 (27)            | Mexico, Guatemala, and Belize                   | III                                    | 1                                       |

Viens LJ, Fleck-Derderian S, Baez-Santiago M, Oduyebo T, Broussard CS, Khan S, et al. Role of prenatal ultrasound and amniocentesis in the diagnosis of congenital Zika syndrome: a systematic review. *Obstet Gynecol* 2020;135.

The authors provided this information as a supplement to their article.

|                             |                            |            |              |
|-----------------------------|----------------------------|------------|--------------|
| Giovanetti 2018 (28)        | Brazil                     | III        | 1            |
| Ho 2018 (29)                | Colombia                   | III        | 1            |
| James-Powell, 2017 (30)     | Jamaica                    | III        | 1            |
| Juca, 2016 (31)             | Brazil                     | III        | 1            |
| Laavanya, 2017 (32)         | Brazil                     | III        | 1            |
| Lemos de Carvalho 2018 (33) | Brazil                     | III        | 1            |
| Lovagnini-Frutos, 2017 (34) | Bolivia                    | III        | 1            |
| Martines, 2016 (35)         | Brazil                     | III        | 3            |
| Linden, 2017 (36)           | Brazil                     | III        | 2            |
| Linden, 2016 (37)           | Brazil                     | III        | 3            |
| <i>Martines, 2016 (38)</i>  | <i>Brazil</i>              | <i>III</i> | <i>(3) †</i> |
| <i>Schwartz, 2017 (39)</i>  | <i>Brazil</i>              | <i>III</i> | <i>(3) †</i> |
| Lockrow 2019 (40)           | Mexico                     | III        | 1            |
| Mattar, 2017 (41)           | Colombia                   | III        | 1            |
| Meaney-Delman, 2016 (42)    | an area with risk of Zika  | III        | 3            |
| Mendonca, 2018 (43)         | Brazil                     | III        | 2            |
| Mlakar, 2016 (44)           | Brazil                     | III        | 1            |
| <i>Strafela, 2017 (45)</i>  | <i>Brazil</i>              | <i>III</i> | <i>(1) †</i> |
| Moron, 2016 (46)            | Brazil                     | III        | 1            |
| Mulkey, 2018 (47)           | Dominican Republic         | III        | 1            |
| Nogueira, 2017 (48)         | Brazil                     | III        | 50           |
| Oliveira, 2016 (49)         | Brazil                     | III        | 1            |
| Parra-Saavedra, 2017 (50)   | Colombia                   | III        | 12           |
| Perez, 2016 (51)            | Venezuela                  | III        | 1            |
| Pereira, 2019 (52)          | Brazil                     | III        | 8            |
| Rabelo, 2017(53)            | Brazil                     | III        | 1            |
| Rajapakse, 2018 (54)        | Guatemala, Brazil          | III        | 4            |
| Rodo, 2017 (55)             | Colombia                   | III        | 1            |
| Santos, 2017 (56)           | Brazil                     | III        | 2            |
| Siqueira Mello, 2019 (57)   | Brazil                     | III        | 1            |
| Sarno, 2016 (58)            | Brazil                     | III        | 1            |
| Saulino, 2017 (59)          | El Salvador                | III        | 1            |
| <i>Zacharias, 2017 (60)</i> | <i>El Salvador</i>         | <i>III</i> | <i>(1) †</i> |
| Schaub, 2017A (61)          | France (Martinique)        | III        | 8            |
| <i>Schaub, 2017B (62)</i>   | <i>France (Martinique)</i> | <i>III</i> | <i>(8) †</i> |
| Soares de Souza, 2016 (63)  | Brazil                     | III        | 2            |
| Sotelo, 2017 (64)           | Brazil                     | III        | 1            |
| Souza, 2016 (65)            | Brazil                     | III        | 1            |
| Spiliopoulos, 2019 (66)     | Jamaica                    | III        | 1            |
| Sulleiro, 2019 (67)         | Colombia                   | III        | 1            |

Viens LJ, Fleck-Derderian S, Baez-Santiago M, Oduyebo T, Broussard CS, Khan S, et al. Role of prenatal ultrasound and amniocentesis in the diagnosis of congenital Zika syndrome: a systematic review. *Obstet Gynecol* 2020;135.

The authors provided this information as a supplement to their article.

|                               |                     |     |                 |
|-------------------------------|---------------------|-----|-----------------|
| Suy, 2016 (68)                | Colombia            | III | 1               |
| Turley, 2018 (69)             | "endemic area"      | III | 4               |
| Valdespino-Vazquez, 2019 (70) | Mexico              | III | 1               |
| Ventura, 2016 (71)            | Venezuela           | III | 1               |
| Vesnaver, 2017 (72)           | Brazil              | III | 1               |
| Villamil-Gomez, 2019 (73)     | Colombia            | III | 1               |
| Werner, 2016 (74)             | Brazil              | III | 1               |
| Werner, 2016 (75)             | Brazil              | III | 1               |
| Yarrington, 2019 (76)         | Haiti               | III | 1               |
| 76 total papers               | 15 unique countries | X   | 385 total cases |

\*United States Preventive Services Task Force (USPSTF) Assessment of Internal Validity: I= Randomized controlled trial (RCT); systematic review or meta-analysis of homogeneous RCTs; II-1=Well-designed controlled trial without randomization; II-2= Well-designed cohort or case-control study; II-3= Multiple time-series, with or without the intervention; III= Opinions of respected authorities, based on clinical experience; descriptive studies or case reports; reports of expert committees.(91)

†Newcastle-Ottawa Quality Assessment Scale: A maximum score of 8 points awarded in three categories, selection (3), comparability (2), and outcomes (3) (92)

‡Italics denote cases that were reported in more than one paper, where both papers provide unique information. Each case appears once in total case count; all papers that provide unique information are included in total reference count.

Viens LJ, Fleck-Derderian S, Baez-Santiago M, Oduyebo T, Broussard CS, Khan S, et al. Role of prenatal ultrasound and amniocentesis in the diagnosis of congenital Zika syndrome: a systematic review. *Obstet Gynecol* 2020;135.

The authors provided this information as a supplement to their article.

©2020 American College of Obstetricians and Gynecologists.

Page 3 of 14

**Appendix 2. Mother–Fetus or Infant Dyads Included in this Systematic Review for Amniocentesis and Congenital Zika Virus Exposure**

| Reference                     | Country of Zika exposure                       | USPSTF internal validity rating;* NOS rating for cohort studies† | Number of dyads included for amniocentesis |
|-------------------------------|------------------------------------------------|------------------------------------------------------------------|--------------------------------------------|
| Pomar, 2017 (3)               | France (French Guiana)                         | II-2; 6                                                          | 2                                          |
| Rodo, 2019 (4)                | Central or South America or Dominican Republic | II-2; 4                                                          | 2                                          |
| Acosta-Reyes, 2017 (8)        | Colombia                                       | III                                                              | 1                                          |
| Adhikari, 2017 (77)           | Honduras                                       | III                                                              | 1                                          |
| Barzon, 2018 (78)             | El Salvador                                    | III                                                              | 2                                          |
| Beaufrère, 2019 (12)          | Martinique, Guadeloupe, Venezuela              | III                                                              | 3                                          |
| Chimelli, 2017 (79)           | Brazil                                         | III                                                              | 3                                          |
| De Oliveira Melo, 2016 (25)   | Brazil                                         | III                                                              | 4                                          |
| Driggers, 2016 (27)           | Mexico, Guatemala, and Belize                  | III                                                              | 1                                          |
| Eijk, 2016 (80)               | Suriname                                       | III                                                              | 1                                          |
| Herrera, 2016 (81)            | Honduras                                       | III                                                              | 1                                          |
| Ho, 2018 (29)                 | Colombia                                       | III                                                              | 1                                          |
| Lovagnini-Frutos, 2017 (34)   | Bolivia                                        | III                                                              | 1                                          |
| Meaney-Delman, 2016 (42)      | an area with risk of Zika                      | III                                                              | 1                                          |
| Pereira, J. P., Jr. 2019 (52) | Brazil                                         | III                                                              | 8                                          |
| Perez, 2016 (51)              | Venezuela                                      | III                                                              | 1                                          |
| Rajapakse, 2018 (54)          | Guatemala, Brazil                              | III                                                              | 1                                          |
| Rodo, 2017 (55)               | Colombia                                       | III                                                              | 1                                          |
| Sarno, 2016 (58)              | Brazil                                         | III                                                              | 1                                          |
| Schaub, 2017A (61)            | France (Martinique)                            | III                                                              | 10                                         |
| <i>Schaub, 2017B (62)</i>     | <i>France (Martinique)</i>                     | <i>III</i>                                                       | <i>(8) ‡</i>                               |
| Sotelo, 2017 (64)             | Brazil                                         | III                                                              | 1                                          |
| Souza, 2016 (65)              | Brazil                                         | III                                                              | 1                                          |
| Sulleiro, 2019 (67)           | Colombia                                       | III                                                              | 1                                          |
| Suy, 2016 (68)                | Colombia                                       | III                                                              | 1                                          |
| Turley, 2018 (69)             | "endemic area"                                 | III                                                              | 3                                          |
| Valdespino-Vazquez, 2019 (70) | Mexico                                         | III                                                              | 1                                          |
| Vorona, 2016 (82)             | Barbados                                       | III                                                              | 1                                          |
| Wongsurawat, 2018 (83)        | Thailand                                       | III                                                              | 1                                          |
| 27 total papers               | 14 unique countries                            | x                                                                | 56 total cases                             |

Viens LJ, Fleck-Derderian S, Baez-Santiago M, Oduyebo T, Broussard CS, Khan S, et al. Role of prenatal ultrasound and amniocentesis in the diagnosis of congenital Zika syndrome: a systematic review. *Obstet Gynecol* 2020;135.

The authors provided this information as a supplement to their article.

\*United States Preventive Services Task Force (USPSTF) Assessment of Internal Validity: I= Randomized controlled trial (RCT); systematic review or meta-analysis of homogeneous RCTs; II-1=Well-designed controlled trial without randomization; II-2= Well-designed cohort or case-control study; II-3= Multiple time-series, with or without the intervention; III= Opinions of respected authorities, based on clinical experience; descriptive studies or case reports; reports of expert committees.(91)

†Newcastle-Ottawa Quality Assessment Scale: A maximum score of 8 points awarded in three categories, selection (3), comparability (2), and outcomes (3)(9, 92)

‡Italics denote cases that were reported in more than one paper, where both papers provide unique information. Each case appears once in total case count; all papers that provide unique information are included in total reference count.

**Appendix 3. Fetuses Without Prenatal Congenital Zika Syndrome Findings on Prenatal Ultrasound but With Congenital Zika Syndrome Abnormalities After Pregnancy Completion**

| SR_ID (reference)           | Latest prenatal ultrasound, weeks' gestation (weeks elapsed from maternal infection or symptoms) | Abnormalities described after pregnancy completion                                                                                                                                                                                                                                                                                                                                                                                                                                                                                                                                                                                                                                                                                                                                                                                                                                                                                                                                                                                                                                                                                                                                                                                                                                                                                                                                                                                                                                                                                   |
|-----------------------------|--------------------------------------------------------------------------------------------------|--------------------------------------------------------------------------------------------------------------------------------------------------------------------------------------------------------------------------------------------------------------------------------------------------------------------------------------------------------------------------------------------------------------------------------------------------------------------------------------------------------------------------------------------------------------------------------------------------------------------------------------------------------------------------------------------------------------------------------------------------------------------------------------------------------------------------------------------------------------------------------------------------------------------------------------------------------------------------------------------------------------------------------------------------------------------------------------------------------------------------------------------------------------------------------------------------------------------------------------------------------------------------------------------------------------------------------------------------------------------------------------------------------------------------------------------------------------------------------------------------------------------------------------|
| 19 Benjamin, 2017 (13)      | 32w (11)                                                                                         | abnormal neurologic exam with clonus, hyperreflexia, posturing; abnormal electroencephalogram; abnormal funduscopic exam with pale optic nerve                                                                                                                                                                                                                                                                                                                                                                                                                                                                                                                                                                                                                                                                                                                                                                                                                                                                                                                                                                                                                                                                                                                                                                                                                                                                                                                                                                                       |
| 25 Brasil, 2016 (1)         | 36w (14)                                                                                         | abnormal neurologic exam with hyperreflexia, clonus of upper and lower extremities, posturing, head lag; and abnormal funduscopic exam                                                                                                                                                                                                                                                                                                                                                                                                                                                                                                                                                                                                                                                                                                                                                                                                                                                                                                                                                                                                                                                                                                                                                                                                                                                                                                                                                                                               |
| 32 Brasil, 2016 (1)         | 33w (19)                                                                                         | hypoplasia of the inferior portion of the vermis, large for gestational age, congenital heart disease, hypoactive                                                                                                                                                                                                                                                                                                                                                                                                                                                                                                                                                                                                                                                                                                                                                                                                                                                                                                                                                                                                                                                                                                                                                                                                                                                                                                                                                                                                                    |
| 110 James-Powell, 2017 (30) | 16w (UNK)                                                                                        | overlapping sutures limiting visualization of brain parenchyma, dilated lateral ventricles but normal third and fourth ventricles, and calcifications;<br>abnormal clinical exam with severe microcephaly, prominent occiput, bitemporal narrowing, collapsed skull bones, small anterior fontanelle, low posteriorly-rotated ears, horizontal nystagmus, redundant skin folds at the nape, wide spaced nipples and large hands with clinodactyly, respiratory distress, generalized cracking and peeling of the skin, hypertonia in the upper limbs with brisk reflexes, severe arthrogryposis with hand and feet contractures, flexion deformities of both hips, hyperextension of the knees with inability to dorsiflex, severe restriction in abduction, hypertonia and hyperreflexia of the upper limbs, "rocker-bottom" feet with prominent calcanei, sandals gap and abnormal creases on the soles, displaced anus with lax anal tone, neonatal seizures;<br>abnormal neurologic exam at six weeks with confirmation of these dysmorphisms, and irritability, bi-frontal facial narrowing, wide nasal bridge, mild retrognathia, high arched palate, diastasis of recti abdominis, small umbilical hernia, external rotation of the hips, hyper-extension at the knees, extra crease beneath patella of both knees, wasting of left lower limbs distally more than proximally, shortening of the left lower limbs, fixed contractures to knees, distal tapering of fingers;<br>abnormal eye exam with bilateral optic atrophy |

Viens LJ, Fleck-Derderian S, Baez-Santiago M, Oduyebo T, Broussard CS, Khan S, et al. Role of prenatal ultrasound and amniocentesis in the diagnosis of congenital Zika syndrome: a systematic review. *Obstet Gynecol* 2020;135.

The authors provided this information as a supplement to their article.

|                         |                                                 |                                                                                                                                                                                                                                                                                                                   |
|-------------------------|-------------------------------------------------|-------------------------------------------------------------------------------------------------------------------------------------------------------------------------------------------------------------------------------------------------------------------------------------------------------------------|
| 119 Martines, 2016 (35) | 20w (16)                                        | neonatal demise; pathology exam with normal division of hemispheres of the brain, lissencephaly, ventriculomegaly with lateral ventricle hydrocephalus, cerebellar hypoplasia, contractures                                                                                                                       |
| 176 Nogueira, 2017 (48) | First trimester (maternal symptoms at 28 weeks) | chorioretinitis, right eye                                                                                                                                                                                                                                                                                        |
| 178 Oliveira, 2016 (49) | 39w (13)                                        | intracranial calcifications, reduced brain parenchyma, notably in the frontal and parietal lobes, ventriculomegaly; microcephaly; abnormal neurologic exam at six months with neuropsychomotor developmental delay, global hypertonia and spastic hemiplegia, with the right dominant side more severely affected |
| 200 Santos, 2017 (56)   | 33w (UNK)                                       | subependymal hemorrhage, multiple subcortical punctiform calcifications, reduced corpus callosum area and cerebral parenchyma, reduced cortical thickness, ventriculomegaly; microcephaly; exotropia                                                                                                              |
| 249 Ventura, 2016 (71)  | UNK (UNK)                                       | intracranial calcifications and mild neuronal migration anomaly; circular hypopigmented lesion superior to the optic nerve left eye                                                                                                                                                                               |
| 271 Hoen, 2018 (2)      | 18w (13)                                        | moderate microcephaly, disproportionate                                                                                                                                                                                                                                                                           |
| 272 Hoen, 2018 (2)      | 32w (26)                                        | bilateral club feet                                                                                                                                                                                                                                                                                               |
| 273 Hoen, 2018 (2)      | 36w (29)                                        | moderate microcephaly, small for gestational age                                                                                                                                                                                                                                                                  |
| 274 Hoen, 2018 (2)      | 30w (22)                                        | moderate microcephaly, small for gestational age                                                                                                                                                                                                                                                                  |
| 275 Hoen, 2018 (2)      | 35w (26)                                        | moderate microcephaly, small for gestational age                                                                                                                                                                                                                                                                  |
| 286 Hoen, 2018 (2)      | 36w (23)                                        | moderate microcephaly, small for gestational age                                                                                                                                                                                                                                                                  |
| 289 Hoen, 2018 (2)      | 36w (22)                                        | moderate microcephaly, small for gestational age                                                                                                                                                                                                                                                                  |
| 290 Hoen, 2018 (2)      | 35w (21)                                        | moderate microcephaly, small for gestational age                                                                                                                                                                                                                                                                  |
| 291 Hoen, 2018 (2)      | 36w (21)                                        | moderate microcephaly, small for gestational age                                                                                                                                                                                                                                                                  |
| 292 Hoen, 2018 (2)      | 37w (18)                                        | moderate microcephaly, small for gestational age                                                                                                                                                                                                                                                                  |
| 294 Hoen, 2018 (2)      | 35w (16)                                        | moderate microcephaly, small for gestational age                                                                                                                                                                                                                                                                  |
| 296 Hoen, 2018 (2)      | 18w (-4)                                        | moderate microcephaly                                                                                                                                                                                                                                                                                             |
| 298 Hoen, 2018 (2)      | 35w (13)                                        | moderate microcephaly, small for gestational age                                                                                                                                                                                                                                                                  |
| 301 Hoen, 2018 (2)      | 36w (11)                                        | moderate microcephaly, small for gestational age                                                                                                                                                                                                                                                                  |
| 302 Hoen, 2018 (2)      | 32w (5)                                         | moderate microcephaly, small for gestational age                                                                                                                                                                                                                                                                  |
| 303 Hoen, 2018 (2)      | 36w (7)                                         | moderate microcephaly                                                                                                                                                                                                                                                                                             |
| 304 Hoen, 2018 (2)      | 35w (5)                                         | moderate microcephaly, small for gestational age                                                                                                                                                                                                                                                                  |

Viens LJ, Fleck-Derderian S, Baez-Santiago M, Oduyebo T, Broussard CS, Khan S, et al. Role of prenatal ultrasound and amniocentesis in the diagnosis of congenital Zika syndrome: a systematic review. *Obstet Gynecol* 2020;135.

The authors provided this information as a supplement to their article.

|                                |           |                                                                                                                                                 |
|--------------------------------|-----------|-------------------------------------------------------------------------------------------------------------------------------------------------|
| 305 Hoen, 2018 (2)             | 37w (5)   | moderate microcephaly, small for gestational age                                                                                                |
| 306 Hoen, 2018 (2)             | 34w (0)   | moderate microcephaly                                                                                                                           |
| 319 Mendonca, 2018 (43)        | UNK (UNK) | microcephaly, ventriculomegaly, calcifications, cerebral atrophy, hydrocephaly; seizures at 5 months                                            |
| 320 Mendonca, 2018 (43)        | UNK (UNK) | microcephaly, ventriculomegaly, calcifications, corpus callosum abnormalities, cerebral atrophy; neuropsychomotor development delay at 7 months |
| 354 Siquieira Mello, 2019 (57) | UNK (UNK) | Microcephaly                                                                                                                                    |
| 376 Walker, 2018 (7)           | UNK (UNK) | Microcephaly                                                                                                                                    |
| 419 Yarrington, 2019 (76)      | 33 (UNK)  | Microcephaly                                                                                                                                    |

SR\_ID Systematic review identification number, UNK unknown, w weeks

Viens LJ, Fleck-Derderian S, Baez-Santiago M, Oduyebo T, Broussard CS, Khan S, et al. Role of prenatal ultrasound and amniocentesis in the diagnosis of congenital Zika syndrome: a systematic review. *Obstet Gynecol* 2020;135.

The authors provided this information as a supplement to their article.

©2020 American College of Obstetricians and Gynecologists.

Page 8 of 14



**Appendix 4. Fetuses With Negative Zika Nucleic Acid Test (NAT) Results on Amniotic Fluid Specimens, but With Congenital Zika Syndrome Abnormalities After Pregnancy Completion**

| SR_ID                             | Gestational age at amniocentesis (time elapsed since maternal infection or symptoms) | Abnormalities described after pregnancy completion                                                                                                                                                                                                                               |
|-----------------------------------|--------------------------------------------------------------------------------------|----------------------------------------------------------------------------------------------------------------------------------------------------------------------------------------------------------------------------------------------------------------------------------|
| 2 Adhikari, 2017 (77)             | UNK (UNK)                                                                            | Hydranencephaly                                                                                                                                                                                                                                                                  |
| 103 De Oliveira Melo, 2016 (25)   | 17w (10)                                                                             | cerebral volume reduction, lissencephaly, ventriculomegaly, callosal hypoplasia, abnormalities of the basal ganglia and or thalami, cerebellar hypoplasia, brainstem hypoplasia, subcortical calcifications, basal ganglia, brainstem or thalamic calcifications, neonatal death |
| 104 De Oliveira Melo, 2016 (25)   | 35w (25)                                                                             | Microcephaly                                                                                                                                                                                                                                                                     |
| 105 De Oliveira Melo, 2016 (25)   | 25w (17)                                                                             | microcephaly, neonatal death                                                                                                                                                                                                                                                     |
| 255 Turley, 2018 (69)             | 30w (10)                                                                             | severe bilateral ventriculomegaly, absent cavum septum pellucidum, white matter and corpus callosal volume loss, multiple subependymal nodules; seizures, developmental delay                                                                                                    |
| 256 Turley, 2018 (69)             | 23w (UNK)                                                                            | colpocephalic configuration of the lateral ventricles and callosal dysgenesis; developmental delay                                                                                                                                                                               |
| 258 Turley, 2018 (69)             | 23w (UNK)                                                                            | severe supratentorial volume loss; severe microcephaly; neonatal death                                                                                                                                                                                                           |
| 321 Pereira, 2019 (52)            | 34w (27)                                                                             | microcephaly, SGA, cortical thinning, hydrocephalus, calcifications, cerebellar hypoplasia                                                                                                                                                                                       |
| 326 Pereira, 2019 (52)            | 30w (18)                                                                             | microcephaly, calcifications, ventriculomegaly, pachygyria, arthrogryposis, optic nerve hypoplasia, macular atrophy, SGA                                                                                                                                                         |
| 357 Valdespino-Vasquez, 2019 (70) | 28w (14)                                                                             | microcephaly, micrognathia and retrognathia, low-set ears, and a depressed nasal bridge, as well as arthrogryposis; hypoplastic cerebral lobes and brain stem; lissencephaly, ventriculomegaly, calcifications.                                                                  |

NAT nucleic acid test, SR\_ID Systematic review identification number, UNK unknown, w weeks

**References**

1. Brasil P, Pereira JP, Moreira ME, Nogueira RMR, Damasceno L, Wakimoto M, et al. Zika virus infection in pregnant women in rio de janeiro. *New England Journal of Medicine* 2016;375(24):2321-34
2. Hoen B, Schaub B, Funk AL, Ardillon V, Boullard M, Cabie A, et al. Pregnancy Outcomes after ZIKV Infection in French Territories in the Americas. *The New England journal of medicine* 2018 Mar 15;378(11):985-94.
3. Pomar L, Malinger G, Benoist G, Carles G, Ville Y, Rousset D, et al. Association between Zika virus and fetopathy: a prospective cohort study in French Guiana. *Ultrasound in obstetrics & gynecology : the official journal of the International Society of Ultrasound in Obstetrics and Gynecology* 2017 Jun;49(6):729-36.

Viens LJ, Fleck-Derderian S, Baez-Santiago M, Oduyebo T, Broussard CS, Khan S, et al. Role of prenatal ultrasound and amniocentesis in the diagnosis of congenital Zika syndrome: a systematic review. *Obstet Gynecol* 2020;135.

The authors provided this information as a supplement to their article.

4. Rodo C, Suy A, Sulleiro E, Soriano-Arandes A, Maiz N, Garcia-Ruiz I, et al. Pregnancy outcomes after maternal Zika virus infection in a non-endemic region: prospective cohort study. *Clinical microbiology and infection : the official publication of the European Society of Clinical Microbiology and Infectious Diseases* 2019 May;25(5):633.e5-.e9.
5. Sanz Cortes M, Rivera AM, Yepez M, Guimaraes CV, Diaz Yunes I, Zarutskie A, et al. Clinical assessment and brain findings in a cohort of mothers, fetuses and infants infected with ZIKA virus. *American journal of obstetrics and gynecology* 2018 Apr;218(4):440.e1-.e36.
6. Sarno M, Aquino M, Pimentel K, Cabral R, Costa G, Bastos F, et al. Progressive lesions of central nervous system in microcephalic fetuses with suspected congenital Zika virus syndrome. *Ultrasound in obstetrics & gynecology : the official journal of the International Society of Ultrasound in Obstetrics and Gynecology* 2016 Sep 19.
7. Walker CL, Merriam AA, Ohuma EO, Dighe MK, Gale M, Jr., Rajagopal L, et al. Femur-sparing pattern of abnormal fetal growth in pregnant women from New York City after maternal Zika virus infection. *American journal of obstetrics and gynecology* 2018 Aug;219(2):187.e1-.e20.
8. Acosta-Reyes J, Navarro E, Herrera MJ, Goenaga E, Ospina ML, Parra E, et al. Severe Neurologic Disorders in 2 Fetuses with Zika Virus Infection, Colombia. *Emerging infectious diseases* 2017 Jun;23(6):982-4.
9. Aragao MdFV, Linden Vvd, Brainer-Lima AM, Coeli RR, Rocha MA, Silva PSd, et al. Clinical features and neuroimaging (CT and MRI) findings in presumed Zika virus related congenital infection and microcephaly: retrospective case series study. *The BMJ* 2016;353(I1901).
10. Arauz D, De Urriola L, Jones J, Castillo M, Martinez A, Murillo E, et al. Febrile or exanthematous illness associated with Zika, dengue, and Chikungunya Viruses, Panama. *Emerging Infectious Diseases* 2016;22(8):1515-7.
11. Azevedo RSS, de Sousa JR, Araujo MTF, Martins Filho AJ, de Alcantara BN, Araujo FMC, et al. In situ immune response and mechanisms of cell damage in central nervous system of fatal cases microcephaly by Zika virus. *Scientific reports* 2018 08 Jan;8(1):1.
12. Beaufrere A, Bessieres B, Bonniere M, Driessen M, Alfano C, Couderc T, et al. A clinical and histopathological study of malformations observed in fetuses infected by the Zika virus. *Brain pathology (Zurich, Switzerland)* 2019 Jan;29(1):114-25.
13. Benjamin I, Fernandez G, Figueira JV, Parpacen L, Urbina MT, Medina R. Zika virus detected in amniotic fluid and umbilical cord blood in an in vitro fertilization-conceived pregnancy in Venezuela. *Fertility and sterility* 2017 Jun;107(6):1319-22.
14. Besnard M, Eyrolle-Guignot D, Guillemette-Artur P, Lastere S, Bost-Bezeaud F, Marcelis L, et al. Congenital cerebral malformations and dysfunction in fetuses and newborns following the 2013 to 2014 Zika virus epidemic in French Polynesia. *Eurosurveillance* 2016;21(13).
15. Brito CAA, Henriques-Souza A, Soares CRP, Castanha PMS, Machado LC, Pereira MR, et al. Persistent detection of Zika virus RNA from an infant with severe microcephaly - a case report. *BMC infectious diseases* 2018;18(388).
16. Calvet G, Aguiar RS, Melo ASO, Sampaio SA, de Filippis I, Fabri A, et al. Detection and sequencing of Zika virus from amniotic fluid of fetuses with microcephaly in Brazil: a case study. *The Lancet Infectious diseases* 2016 Jun;16(6):653-60.
17. Oliveira Melo AS, Malinger G, Ximenes R, Szejnfeld PO, Alves Sampaio S, Bispo de Filippis AM. Zika virus intrauterine infection causes fetal brain abnormality and microcephaly: tip of the iceberg? *Ultrasound in obstetrics & gynecology : the official journal of the International Society of Ultrasound in Obstetrics and Gynecology* 2016 Jan;47(1):6-7.

Viens LJ, Fleck-Derderian S, Baez-Santiago M, Oduyebo T, Broussard CS, Khan S, et al. Role of prenatal ultrasound and amniocentesis in the diagnosis of congenital Zika syndrome: a systematic review. *Obstet Gynecol* 2020;135.

The authors provided this information as a supplement to their article.

18. Carvalho FH, Cordeiro KM, Peixoto AB, Tonni G, Moron AF, Feitosa FE, et al. Associated ultrasonographic findings in fetuses with microcephaly because of suspected Zika virus (ZIKV) infection during pregnancy. *Prenatal diagnosis* 2016 Sep;36(9):882-7.
19. Castro JDV, Pereira LP, Dias DA, Aguiar LB, Maia JCN, Costa J, et al. Presumed Zika virus-related congenital brain malformations: the spectrum of CT and MRI findings in fetuses and newborns. *Arquivos de neuro-psiquiatria* 2017 Oct;75(10):703-10.
20. Chen L, Hafeez F, Curry CL, Elgart G. Cutaneous eruption in a U.S. woman with locally acquired zika virus infection. *New England Journal of Medicine* 2017;376(4):400-1.
21. Contreras-Capetillo SN, Valadez-Gonzalez N, Manrique-Saide P, Carcano-Castillo RE, Pacheco-Tugores F, Barrera-Perez HAM, et al. Birth Defects Associated With Congenital Zika Virus Infection in Mexico. *Clinical pediatrics* 2017 Nov 01:9922817738341.
22. Culjat M, Darling SE, Nerurkar VR, Ching N, Kumar M, Min SK, et al. Clinical and Imaging Findings in an Infant With Zika Embryopathy. *Clinical infectious diseases : an official publication of the Infectious Diseases Society of America* 2016 Sep 15;63(6):805-11.
23. Davila-Castro NM, Reyes-Bou Z, Correa-Rivas M, Perez-Berenguer JL, Di-Pasquale L, Garcia-Garcia I. First Autopsy of a Newborn with Congenital Zika Syndrome in Puerto Rico. *Puerto Rico health sciences journal* 2018 Dec;37(Spec Issue):S81-s4.
24. de Oliveira Dias JR, Ventura CV, Borba PD, de Paula Freitas B, Pierroti LC, do Nascimento AP, et al. Infants with congenital zika syndrome and ocular findings from sao paulo, brazil: spread of infection. *Retinal cases & brief reports* 2017 Jan 02.
25. De Oliveira Melo AS, Aguiar RS, Amorim MMR, Arruda MB, De Oliveira Melo F, Ribeiro STC, et al. Congenital Zika virus infection: Beyond neonatal microcephaly. *JAMA Neurology* 2016;73(12):1407-16.
26. Diaz-Menendez M, de la Calle-Prieto F, Montero D, Antolin E, Vazquez A, Arsuaga M, et al. Initial experience with imported Zika virus infection in Spain. *Enfermedades infecciosas y microbiologia clinica* 2016 Oct 12.
27. Driggers RW, Ho CY, Korhonen EM, Kuivanen S, Jaaskelainen AJ, Smura T, et al. Zika virus infection with prolonged maternal viremia and fetal brain abnormalities. *New England Journal of Medicine* 2016;374(22):2142-51.
28. Giovanetti M, Jesus JGd, Maia MLd, Junior JX, Amarante MFC, Viana P, et al. Genetic evidence of Zika virus in mother's breast milk and body fluids of a newborn with severe congenital defects. *Clinical Microbiology and Infection* 2018;24(10):1111-2.
29. Ho CY, Castillo N, Encinales L, Porras A, Mendoza AR, Lynch R, et al. Second-trimester Ultrasound and Neuropathologic Findings in Congenital Zika Virus Infection. *The Pediatric infectious disease journal* 2018 Dec;37(12):1290-3.
30. James-Powell T, Brown Y, Christie CDC, Melbourne-Chambers R, Moore JT, Morgan O, et al. Trends of microcephaly and severe arthrogryposis in three urban hospitals following the Zika, chikungunya and dengue fever epidemics of 2016 in Jamaica. *West Indian Med J* 2017;66(1):10-9.
31. Juca E, Pessoa A, Ribeiro E, Mota VM, Gouveia PH, Juca RV, et al. Zika virus associated microcephaly: A threatening outbreak imposing differential diagnosis with neurosurgical diseases. *Child's Nervous System* 2016;32(5):928.
32. Laavanya VP, Jayasurya R, Kavitha N, Prabakaran G, Jayakumari S. A review on microcephaly associated with zika fever in new born babies. *Research Journal of Pharmacy and Technology* 2017;10(1):337-40.
33. Lemos de Carvalho A, Brites C, Taguchi TB, Pinho SF, Campos G, Lucena R. Congenital Zika Virus Infection with Normal Neurodevelopmental Outcome, Brazil. *Emerging infectious diseases* 2018 Nov;24(11):2128-30.

Viens LJ, Fleck-Derderian S, Baez-Santiago M, Oduyebo T, Broussard CS, Khan S, et al. Role of prenatal ultrasound and amniocentesis in the diagnosis of congenital Zika syndrome: a systematic review. *Obstet Gynecol* 2020;135.

The authors provided this information as a supplement to their article.

34. Lovagnini Frutos MG, Ochoa JH, Barbas MG, Lucchini HD, Moya M, Malinger G. New Insights into the Natural History of Congenital Zika Virus Syndrome. *Fetal diagnosis and therapy* 2017 Sep 13.
35. Martines RB, Bhatnagar J, de Oliveira Ramos AM, Davi HP, Iglezias SD, Kanamura CT, et al. Pathology of congenital Zika syndrome in Brazil: a case series. *Lancet (London, England)* 2016 Aug 27;388(10047):898-904.
36. Linden VV, Linden HVJ, Leal MC, Rolim ELF, Linden AV, Aragao M, et al. Discordant clinical outcomes of congenital Zika virus infection in twin pregnancies. *Arquivos de neuro-psiquiatria* 2017 Jun;75(6):381-6.
37. Linden Vvd, Pessoa A, Dobyns W, Barkovich AJ, Linden Junior Hvd, Rolim Filho EL, et al. Description of 13 infants born during October 2015-January 2016 with congenital Zika virus infection without microcephaly at birth - Brazil. *Morbidity and Mortality Weekly Report* 2016;65(47):1343-8.
38. Martines RB, Bhatnagar J, Keating MK, Silva-Flannery L, Muehlenbachs A, Gary J, et al. Evidence of zika virus infection in brain and placental tissues from two congenitally infected newborns and two fetal losses - Brazil, 2015. *Morbidity and Mortality Weekly Report* 2016;65(6):159-60.
39. Schwartz DA. Autopsy and Postmortem Studies Are Concordant: Pathology of Zika Virus Infection Is Neurotropic in Fetuses and Infants With Microcephaly Following Transplacental Transmission. *Archives of pathology & laboratory medicine* 2017 Jan;141(1):68-72.
40. Lockrow J, Tully H, Saneto RP. Epileptic spasms as the presenting seizure type in a patient with a new “O” of TORCH, congenital Zika virus infection. *Epilepsy and Behavior Case Reports* 2019;11:1-3.
41. Mattar S, Ojeda C, Arboleda J, Arrieta G, Bosch I, Botia I, et al. Case report: microcephaly associated with Zika virus infection, Colombia. *BMC infectious diseases* 2017 Jun 13;17(1):423.
42. Meaney-Delman D, Oduyebo T, Polen KN, White JL, Bingham AM, Slavinski SA, et al. Prolonged Detection of Zika Virus RNA in Pregnant Women. *Obstetrics and gynecology* 2016 Oct;128(4):724-30.
43. Mendonca AKRH, Lima SO. Neurological impairment of the monozygotic twins with congenital infection presumed by Zika virus: case report. *Rev Bras Saude Matern Infant* 2018;18(1):247-52.
44. Mlakar J, Korva M, Tul N, Popovic M, Poljsak-Prijatelj M, Mraz J, et al. Zika Virus Associated with Microcephaly. *The New England journal of medicine* 2016 Mar 10;374(10):951-8.
45. Strafela P, Vizjak A, Mraz J, Mlakar J, Pizem J, Tul N, et al. Zika virus-associated micrencephaly: A thorough description of neuropathologic findings in the fetal central nervous system. *Arch Pathol Lab Med* 2017;141(1):73-81.
46. Moron AF, Cavalheiro S, Milani H, Sarmiento S, Tanuri C, de Souza FF, et al. Microcephaly associated with maternal Zika virus infection. *BJOG : an international journal of obstetrics and gynaecology* 2016 Jul;123(8):1265-9.
47. Mulkey SB, Vezina G, Bulas DI, Khademian Z, Blask A, Kousa Y, et al. Neuroimaging Findings in Normocephalic Newborns With Intrauterine Zika Virus Exposure. *Pediatric neurology* 2018 Jan;78:75-8.
48. Nogueira ML, Rocha Nery Junior NR, Estofolete CF, Bernardes Terzian AC, de Freitas Guimaraes G, Zini N, et al. Adverse birth outcomes associated with Zika virus exposure during pregnancy in Sao Jose do Rio Preto, Brazil. *Clinical microbiology and infection : the official publication of the European Society of Clinical Microbiology and Infectious Diseases* 2017 Nov 10.
49. Oliveira DB, Almeida FJ, Durigon EL, Mendes É, Braconi CT, Marchetti I, et al. Prolonged Shedding of Zika Virus Associated with Congenital Infection. *The New England journal of medicine* 2016;375(12):1202-4.
50. Parra-Saavedra M, Reefhuis J, Piraquive JP, Gilboa SM, Badell ML, Moore CA, et al. Serial Head and Brain Imaging of 17 Fetuses With Confirmed Zika Virus Infection in Colombia, South America. *Obstetrics and gynecology* 2017 Jul;130(1):207-12.
51. Perez S, Tato R, Cabrera JJ, Lopez A, Robles O, Paz E, et al. Confirmed case of Zika virus congenital infection, Spain, March 2016. *Euro surveillance : bulletin Europeen sur les maladies transmissibles = European communicable disease bulletin* 2016 Jun 16;21(24).

Viens LJ, Fleck-Derderian S, Baez-Santiago M, Oduyebo T, Broussard CS, Khan S, et al. Role of prenatal ultrasound and amniocentesis in the diagnosis of congenital Zika syndrome: a systematic review. *Obstet Gynecol* 2020;135.

The authors provided this information as a supplement to their article.

52. Pereira JP, Jr., Maykin MM, Vasconcelos Z, Avvad-Portari E, Zin AA, Tsui I, et al. The Role of Amniocentesis in the Diagnosis of Congenital Zika Syndrome. *Clinical infectious diseases : an official publication of the Infectious Diseases Society of America* 2019 Jan 8.
53. Rabelo K, de Souza Campos Fernandes RC, de Souza LJ, Louvain de Souza T, Dos Santos FB, Guerra Nunes PC, et al. Placental Histopathology and Clinical Presentation of Severe Congenital Zika Syndrome in a Human Immunodeficiency Virus-Exposed Uninfected Infant. *Frontiers in immunology* 2017;8:1704.
54. Rajapakse NS, Ellsworth K, Liesman RM, Ho M, Henry N, Theel ES, et al. Unilateral phrenic nerve palsy in infants with congenital Zika syndrome. *Emerging Infectious Diseases* 2018;24(8):1422-7.
55. Rodo C, Suy A, Sulleiro E, Soriano-Arandes A, Anton A, Garcia I, et al. In utero negativization of Zika virus in a case with serious Central Nervous System abnormalities. *Clinical microbiology and infection : the official publication of the European Society of Clinical Microbiology and Infectious Diseases* 2017.
56. Santos VS, Oliveira SJG, Gurgel RQ, Lima DRR, Dos Santos CA, Martins-Filho PRS. Case Report: Microcephaly in Twins due to the Zika Virus. *The American journal of tropical medicine and hygiene* 2017 Jul;97(1):151-4.
57. Siqueira Mello A, Pascalicchio Bertozzi APA, Rodrigues MMD, Gazeta RE, Moron AF, Soriano-Arandes A, et al. Development of Secondary Microcephaly After Delivery: Possible Consequence of Mother-Baby Transmission of Zika Virus in Breast Milk. *The American journal of case reports* 2019 May 21;20:723-5.
58. Sarno M, Sacramento GA, Khouri R, do Rosario MS, Costa F, Archanjo G, et al. Zika Virus Infection and Stillbirths: A Case of Hydrops Fetalis, Hydranencephaly and Fetal Demise. *PLoS neglected tropical diseases* 2016 Feb;10(2):e0004517.
59. Saulino D, Gaston E, Younke B, Conyers JA, Covinsky M, Tatevian N, et al. The first zika-related infant mortality in the United States: An autopsy case report. *Laboratory Investigation* 2017;97:10A.
60. Zacharias N, Whitty J, Noblin S, Tsakiri S, Garcia J, Covinsky M, et al. First Neonatal Demise with Travel-Associated Zika Virus Infection in the United States of America. *AJP reports* 2017 Apr;7(2):e68-e73.
61. Schaub B, Gueneret M, Jolivet E, Decatrelle V, Yazza S, Gueye H, et al. Ultrasound imaging for identification of cerebral damage in congenital Zika virus syndrome: a case series. *The Lancet Child and Adolescent Health* 2017;1(1):45-55.
62. Schaub B, Vouga M, Najjioullah F, Gueneret M, Monthieux A, Harte C, et al. Analysis of blood from Zika virus-infected fetuses: a prospective case series. *The Lancet Infectious diseases* 2017 May;17(5):520-7.
63. Soares de Souza A, Moraes Dias C, Braga FD, Terzian AC, Estofolete CF, Oliani AH, et al. Fetal Infection by Zika Virus in the Third Trimester: Report of 2 Cases. *Clinical infectious diseases : an official publication of the Infectious Diseases Society of America* 2016 Dec 15;63(12):1622-5.
64. Sotelo JR, Sotelo AB, Sotelo FJB, Doi AM, Pinho JRR, Oliveira RC, et al. Persistence of Zika Virus in Breast Milk after Infection in Late Stage of Pregnancy. *Emerging infectious diseases* 2017 May;23(5):856-7.
65. Souza ASR, Cordeiro MT, Meneses JA, Honorato E, Araujo Júnior E, Castanha PMS, et al. Clinical and laboratory diagnosis of congenital zika virus syndrome and diaphragmatic unilateral palsy: Case report. *Rev Bras Saude Matern Infant* 2016;16(4):467-73.
66. Spiliopoulos D, Panchal M, Economides DL. Surveillance of pregnant women with potential exposure to Zika virus following travel. *Il Giornale di chirurgia* 2019 Jan-Feb;40(1):58-65.
67. Sulleiro E, Frick MA, Rodó C, Espasa M, Thorne C, Espiau M, et al. The challenge of the laboratory diagnosis in a confirmed congenital Zika virus syndrome in utero: A case report. *Medicine (Baltimore)* 2019 May;98(20).
68. Suy A, Sulleiro E, Rodo C, Vazquez E, Bocanegra C, Molina I, et al. Prolonged Zika Virus Viremia during Pregnancy. *The New England journal of medicine* 2016 Dec 29;375(26):2611-3.

Viens LJ, Fleck-Derderian S, Baez-Santiago M, Oduyebo T, Broussard CS, Khan S, et al. Role of prenatal ultrasound and amniocentesis in the diagnosis of congenital Zika syndrome: a systematic review. *Obstet Gynecol* 2020;135.

The authors provided this information as a supplement to their article.

69. Turley M, Valentine G, Seferovic M, Rac M, Eppes C, Major A, et al. Importance of placental testing in congenital zika virus (zikv) infection and fetal malformation syndrome. *American Journal of Obstetrics and Gynecology* 2018;218(1 Supplement 1):S54-S5.
70. Valdespino-Vazquez MY, Sevilla-Reyes EE, Lira R, Yocupicio-Monroy M, Piten-Isidro E, Boukadida C, et al. Congenital Zika Syndrome and Extra-Central Nervous System Detection of Zika Virus in a Pre-term Newborn in Mexico. *Clinical infectious diseases : an official publication of the Infectious Diseases Society of America* 2019 Mar 5;68(6):903-12.
71. Ventura CV, Fernandez MP, Gonzalez IA, Rivera-Hernandez DM, Lopez-Alberola R, Peinado M, et al. First Travel-Associated Congenital Zika Syndrome in the US: Ocular and Neurological Findings in the Absence of Microcephaly. *Ophthalmic surgery, lasers & imaging retina* 2016 Oct 01;47(10):952-5.
72. Vesnaver TV, Tul N, Mehrabi S, Parisson F, Štrafela P, Mlakar J, et al. Zika virus associated microcephaly/micrencephaly—fetal brain imaging in comparison with neuropathology. *BJOG Int J Obstet Gynaecol* 2017;124(3):521-5.
73. Villamil-Gomez WE, Padilla-Ruiz D, Mendoza A, Alvarez A, Baldrich-Gomez O, Posso H, et al. Urinary bladder agenesis and renal hypoplasia potentially related to in utero Zika virus infection. *International journal of infectious diseases : IJID : official publication of the International Society for Infectious Diseases* 2019 May 24;85:54-6.
74. Werner H, Fazecas T, Guedes B, Lopes Dos Santos J, Daltro P, Tonni G, et al. Intrauterine Zika virus infection and microcephaly: correlation of perinatal imaging and three-dimensional virtual physical models. *Ultrasound in obstetrics & gynecology : the official journal of the International Society of Ultrasound in Obstetrics and Gynecology* 2016 May;47(5):657-60.
75. Werner H, Sodre D, Hygino C, Guedes B, Fazecas T, Nogueira R, et al. First-trimester intrauterine Zika virus infection and brain pathology: prenatal and postnatal neuroimaging findings. *Prenatal diagnosis* 2016 Aug;36(8):785-9.
76. Yarrington CD, Hamer DH, Kuohung W, Lee-Parritz A. Congenital Zika syndrome arising from sexual transmission of Zika virus, a case report. *Fertil Res Pract* 2019;5.
77. Adhikari EH, Nelson DB, Johnson KA, Jacobs S, Rogers VL, Roberts SW, et al. Infant outcomes among women with Zika virus infection during pregnancy: results of a large prenatal Zika screening program. *American journal of obstetrics and gynecology* 2017 Mar;216(3):292.e1-e8.
78. Barzon L, Percivalle E, Pacenti M, Rovida F, Zavattoni M, Del Bravo P, et al. Virus and Antibody Dynamics in Travelers With Acute Zika Virus Infection. *Clinical infectious diseases : an official publication of the Infectious Diseases Society of America* 2017 Dec 30.
79. Chimelli L, Melo ASO, Avvad-Portari E, Wiley CA, Camacho AHS, Lopes VS, et al. The spectrum of neuropathological changes associated with congenital Zika virus infection. *Acta neuropathologica* 2017 Jun;133(6):983-99.
80. Eijk AAvd, Genderen PJv, Verdijk RM, Reusken CB, Mogling R, Kampen JJA, et al. Miscarriage associated with Zika virus infection. *New England Journal of Medicine* 2016;375(10):1002-4.
81. Herrera K, Bernasko J, Garry D, Vahanian S, Kaplan C. Vertical transmission of Zika virus (ZIKV) in early pregnancy: Two cases, two different courses. *Case Reports in Perinatal Medicine* 2016;5(2):131-3.
82. Vorona GA, Lanni SM. Fetal Magnetic Resonance Imaging Evaluation of a 21-Week Fetus With Zika Virus Infection. *Pediatric neurology* 2016 Dec;65:98-9.
83. Wongsurawat T, Jenjaroenpun P, Athipanyasilp N, Kaewnapan B, Leelahakorn N, Angkasekwinai N, et al. Genome Sequences of Zika Virus Strains Recovered from Amniotic Fluid, Placenta, and Fetal Brain of a Microcephaly Patient in Thailand, 2017. *Microbiology Resource Announcements* 2018;7(11).

Viens LJ, Fleck-Derderian S, Baez-Santiago M, Oduyebo T, Broussard CS, Khan S, et al. Role of prenatal ultrasound and amniocentesis in the diagnosis of congenital Zika syndrome: a systematic review. *Obstet Gynecol* 2020;135.

The authors provided this information as a supplement to their article.
